# Supplementary material
Source: PubMed Central journal article supplement (PMC1783129)
Supplement: pnas_0603422104_4.pdf [file pnas_0603422104_4.pdf]

**Table 3. Summary of species characteristics**

|                    |                | Total | Polar | Temperate | Tropical | L | P  |
|--------------------|----------------|-------|-------|-----------|----------|---|----|
| Total              |                | 72    | 8     | 52        | 12       |   |    |
| Developmental type | Lecithotrophic | 16    | 5     | 9         | 2        |   |    |
|                    | Planktotrophic | 56    | 3     | 43        | 10       |   |    |
| Phylum             | Brachiopoda    | 1     | 0     | 1         | 0        | 1 | 0  |
|                    | Arthropoda     | 39    | 4     | 31        | 4        | 4 | 35 |
|                    | Echinodermata  | 4     | 0     | 3         | 1        | 2 | 2  |
|                    | Chordata       | 6     | 1     | 3         | 2        | 0 | 6  |
|                    | Mollusca       | 17    | 0     | 13        | 4        | 6 | 11 |
|                    | Annelida       | 5     | 3     | 1         | 1        | 3 | 2  |

L, Lecithotrophic or nonfeeding development; P, planktotrophic or feeding development.
