# Supplementary material
Source: PubMed Central journal article supplement (PMC1783129)
Supplement: pnas_0603422104_5.pdf [file pnas_0603422104_5.pdf]

**Table 4. Studies used in analyses.**

| Phylum     | Species                     | Developmental mode | Temp (°C) | PLD (d) | Reference                  |
|------------|-----------------------------|--------------------|-----------|---------|----------------------------|
| Annelida   | <i>Circeus spirillum</i>    | L                  | 5         | 16      | Ushakova (1)               |
|            |                             |                    | 10        | 16      |                            |
|            |                             |                    | 15        | 4       |                            |
|            | <i>Hydroides elegans</i>    | P                  | 15        | 8.0     | Qiu & Qian (2)             |
|            |                             |                    | 20        | 6.5     |                            |
|            |                             |                    | 25        | 5.0     |                            |
|            |                             |                    | 30        | 3.5     |                            |
|            | <i>Nereis virens</i>        | L                  | 5         | 15.0    | Ushakova & Sarantchova (3) |
|            |                             |                    | 10        | 9.5     |                            |
|            |                             |                    | 17        | 4.5     |                            |
|            | <i>Scolecoides viridis</i>  | P                  | 10        | 42      | George (4)                 |
|            |                             |                    | 20        | 26      |                            |
|            | <i>Spirorbis spirorbis</i>  | L                  | 5         | 16      | Ushakova (1)               |
|            |                             |                    | 10        | 7       |                            |
|            |                             |                    | 15        | 7       |                            |
| Arthropoda | <i>Armases miersii</i>      | L                  | 23.9      | 19.3    | Schuh & Diesel (5)         |
|            |                             |                    | 29.3      | 11.0    |                            |
|            | <i>Balanus amphitrite</i>   | P                  | 15        | 16      | Anil <i>et al.</i> (6)     |
|            |                             |                    | 20        | 13      |                            |
|            |                             |                    | 23        | 9       |                            |
|            |                             |                    | 25        | 8       |                            |
|            |                             |                    | 27        | 9       |                            |
|            | <i>Balanus eburneus</i>     | P                  | 20        | 10.8    | Scheltema & Williams (7)   |
|            |                             |                    | 25        | 8.4     |                            |
|            |                             |                    | 30        | 3.9     |                            |
|            | <i>Balanus trigonus</i>     | P                  | 18        | 10      | Thiyagarajan (8)           |
|            |                             |                    | 21        | 7       |                            |
|            |                             |                    | 24        | 5       |                            |
|            |                             |                    | 28        | 4       |                            |
|            | <i>Callianassa tyrrhena</i> | P                  | 14        | 16.6    | Thessalou-Legaki (9)       |
| 18         |                             |                    | 7.6       |         |                            |

---

|                             |   |      |      |                            |
|-----------------------------|---|------|------|----------------------------|
|                             |   | 22   | 5.1  |                            |
|                             |   | 25   | 3.2  |                            |
| <i>Cancer gracilis</i>      | P | 10   | 67.0 | Sulkin & McKeen (10)       |
|                             |   | 15   | 34.2 |                            |
|                             |   | 20   | 23.4 |                            |
| <i>Cancer irroratus</i>     | P | 10   | 50   | Johns (11)                 |
|                             |   | 15   | 26   |                            |
|                             |   | 18   | 19   |                            |
|                             |   | 21   | 17   |                            |
|                             |   | 24   | 17   |                            |
| <i>Cancer oregonensis</i>   | P | 10   | 71.7 | Sulkin & McKeen (10)       |
|                             |   | 15   | 34.8 |                            |
| <i>Cancer magister</i>      | P | 10   | 68.9 | Sulkin & McKeen (12)       |
|                             |   | 15   | 38.5 |                            |
| <i>Cancer productus</i>     | P | 10   | 59.2 | Sulkin & McKeen (10)       |
|                             |   | 15   | 33.6 |                            |
|                             |   | 20   | 28.2 |                            |
| <i>Carcinus maenas</i>      | P | 12   | 63.1 | Dawirs (13)                |
|                             |   | 15   | 42.2 |                            |
|                             |   | 18   | 30.5 |                            |
|                             |   | 25   | 23.5 |                            |
| <i>Chthamalus stellatus</i> | P | 18.9 | 16   | Burrows <i>et al.</i> (14) |
|                             |   | 22.6 | 15   |                            |
| <i>Chthamalus montagui</i>  | P | 17.6 | 13   | Burrows <i>et al.</i> (14) |
|                             |   | 18.9 | 11   |                            |
|                             |   | 22.6 | 11   |                            |
| <i>Elminius modestus</i>    | P | 6    | 42   | Harms (15)                 |
|                             |   | 12   | 16   |                            |
|                             |   | 18   | 10   |                            |
|                             |   | 24   | 7    |                            |
| <i>Eriocheir sinensis</i>   | P | 12   | 94.0 | Anger (16)                 |
|                             |   | 15   | 61.0 |                            |
|                             |   | 18   | 44.5 |                            |

---

---

|                               |   |      |      |                             |
|-------------------------------|---|------|------|-----------------------------|
| <i>Hemigrapsus sanguineus</i> | P | 15   | 53.0 | Epifanio <i>et al.</i> (17) |
|                               |   | 20   | 20.8 |                             |
|                               |   | 25   | 15.6 |                             |
| <i>Homarus americanus</i>     | P | 10.0 | 110  | MacKenzie (18)              |
|                               |   | 12.2 | 65   |                             |
|                               |   | 14.8 | 45   |                             |
|                               |   | 18.0 | 34   |                             |
|                               |   | 21.5 | 24   |                             |
| <i>Hyas araneus</i>           | P | 6    | 103. | Anger (19)                  |
|                               |   | 12   | 6    |                             |
|                               |   | 18   | 55.4 |                             |
|                               |   |      | 35.5 |                             |
| <i>Limulus polyphemus</i>     | L | 20   | 118  | Laughlin (20)               |
|                               |   | 25   | 52   |                             |
|                               |   | 30   | 23   |                             |
| <i>Lithodes santolla</i>      | L | 3    | 129. | Anger <i>et al.</i> (21)    |
|                               |   | 6    | 0    |                             |
|                               |   | 9    | 60.1 |                             |
|                               |   | 12   | 43.4 |                             |
|                               |   | 15   | 32.9 |                             |
|                               |   |      | 19.3 |                             |
| <i>Lysmata seticaudata</i>    | P | 20   | 31.8 | Calado <i>et al.</i> (22)   |
|                               |   | 26   | 19.5 |                             |
| <i>Menippe mercenaria</i>     | P | 25   | 41   | Brown <i>et al.</i> (23)    |
|                               |   | 30   | 28   |                             |
| <i>Mithrax caribbaeus</i>     | P | 22   | 14   | Larez <i>et al.</i> (24)    |
|                               |   | 25   | 12   |                             |
|                               |   | 28   | 9    |                             |
| <i>Necora puber</i>           | P | 15   | 48.5 | Valdes <i>et al.</i> (25)   |
|                               |   | 20   | 31.6 |                             |
|                               |   | 25   | 28.0 |                             |
| <i>Pagurus bernhardus</i>     | P | 6    | 109  | Dawirs (26)                 |
|                               |   | 12   | 51   |                             |
|                               |   | 18   | 33   |                             |

---

---

|                                  |   |      |       |                            |
|----------------------------------|---|------|-------|----------------------------|
| <i>Pagurus criniticornis</i>     | P | 30   | 13.3  | Blaszkowski & Moreira (27) |
|                                  |   | 25   | 20.5  |                            |
|                                  |   | 20   | 27.0  |                            |
| <i>Palaemonetes longirostris</i> | P | 20   | 23.0  | Antonopoulou & Emson (28)  |
|                                  |   | 25   | 16.5  |                            |
| <i>Palaemonetes pugio</i>        | P | 20   | 31.8  | McKenney & Neff (29)       |
|                                  |   | 25   | 17.5  |                            |
|                                  |   | 30   | 14.5  |                            |
| <i>Palaemonetes varians</i>      | P | 15   | 22.5  | Antonopoulou & Emson (28)  |
|                                  |   | 20   | 15.0  |                            |
|                                  |   | 25   | 11.0  |                            |
| <i>Palaemonetes vulgaris</i>     | P | 20.3 | 30.2  | Sandifer (30)              |
|                                  |   | 25.4 | 16.6  |                            |
|                                  |   | 30.6 | 15.7  |                            |
| <i>Pandalus borealis</i>         | P | 2.5  | 97    | Rasmussen & Tande (31)     |
|                                  |   | 4.3  | 70    |                            |
| <i>Panopeus herbstii</i>         | P | 20   | 34    | Sastry (32)                |
|                                  |   | 25   | 26    |                            |
| <i>Paralomis granulosa</i>       | L | 3    | 117.4 | Anger <i>et al.</i> (33)   |
|                                  |   | 6    | 55.2  |                            |
|                                  |   | 9    | 41.2  |                            |
|                                  |   | 12   | 30.8  |                            |
|                                  |   | 15   | 24.3  |                            |
| <i>Parthenope serrata</i>        | P | 25   | 30    | Yang (34)                  |
|                                  |   | 20   | 45    |                            |
| <i>Rhithropanopeus harrisii</i>  | P | 20   | 33    | Costlow <i>et al.</i> (35) |
|                                  |   | 25   | 18    |                            |
|                                  |   | 30   | 13    |                            |
| <i>Scylla serrata</i>            | P | 20   | 37.7  | Hamasaki (36)              |
|                                  |   | 23   | 24.6  |                            |
|                                  |   | 26   | 17.7  |                            |
|                                  |   | 29   | 13.0  |                            |

---

---

|                |                                      |   |    |      |                             |
|----------------|--------------------------------------|---|----|------|-----------------------------|
|                | <i>Semibalanus balanoides</i>        | P | 6  | 20   | Harms (15)                  |
|                |                                      |   | 12 | 12   |                             |
|                |                                      |   | 18 | 10   |                             |
|                | <i>Sesarma cinereum</i>              | P | 20 | 37   | Costlow <i>et al.</i> (37)  |
|                |                                      |   | 25 | 31   |                             |
|                |                                      |   | 30 | 21   |                             |
|                | <i>Uca pugilator</i>                 | P | 22 | 19.4 | Christy (38)                |
|                |                                      |   | 24 | 19.6 |                             |
|                |                                      |   | 28 | 14.7 |                             |
| Brachiopoda    | <i>Laqueus californianus</i>         | L | 5  | 9    | Pennington (39)             |
|                |                                      |   | 10 | 7    |                             |
|                |                                      |   | 15 | 5    |                             |
| Chordata       | <i>Amphiprion melanopus</i>          | P | 25 | 12.3 | Green & Fisher (40)         |
|                |                                      |   | 28 | 9.0  |                             |
|                | <i>Clupea harengus pallasii</i>      | P | 6  | 6    | McGurk (41)                 |
|                |                                      |   | 8  | 5    |                             |
|                |                                      |   | 10 | 4    |                             |
|                | <i>Gadus morhua</i>                  | P | 4  | 56   | Otterlei <i>et al.</i> (42) |
|                |                                      |   | 6  | 40   |                             |
|                |                                      |   | 8  | 33   |                             |
|                |                                      |   | 10 | 27   |                             |
|                |                                      |   | 12 | 25   |                             |
|                |                                      |   | 14 | 23   |                             |
|                | <i>Pseudopleuronectes americanus</i> | P | 5  | 80   | Laurence (43)               |
|                |                                      |   | 8  | 49   |                             |
|                | <i>Sprattus sprattus</i>             | P | 5  | 3    | Nissling (44)               |
|                |                                      |   | 13 | 1    |                             |
|                | <i>Upeneus tragula</i>               | P | 25 | 12.0 | McCormick & Molony (45)     |
|                |                                      |   | 30 | 9.2  |                             |
| Echino-dermata | <i>Dendraster excentricus</i>        | P | 12 | 8.29 | McEdward (46)               |
|                |                                      |   | 17 | 4.46 |                             |
|                |                                      |   | 22 | 2.63 |                             |
|                | <i>Echinaster type I</i>             | L | 20 | 22   | Watts <i>et al.</i> (47)    |

---

---

|          |                              |   |      |      |                               |
|----------|------------------------------|---|------|------|-------------------------------|
|          |                              |   | 25   | 12   |                               |
|          |                              |   | 30   | 14   |                               |
|          | <i>Echinaster type II</i>    | L | 20   | 22   | Watts <i>et al.</i> (47)      |
|          |                              |   | 25   | 17   |                               |
|          |                              |   | 30   | 13   |                               |
|          | <i>Lytechinus variegatus</i> | P | 18   | 39.5 | Roller & Stickle (48)         |
|          |                              |   | 23   | 24.5 |                               |
|          | <i>Cardium edule</i>         | P | 15   | 28   | Kingston (49)                 |
|          |                              |   | 20   | 22   |                               |
| Mollusca | <i>Chlamys hastata</i>       | P | 16   | 34   | Hodgson & Bourne (50)         |
|          |                              |   | 12   | 42   |                               |
|          | <i>Crassostrea virginica</i> | P | 23.0 | 18   | Loosanoff & Davis (51)        |
|          |                              |   | 30.0 | 10   |                               |
|          |                              |   | 23.5 | 18   |                               |
|          | <i>Crepidula fornicata</i>   | P | 18   | 42   | Pechenik (52)                 |
|          |                              |   | 24   | 24   |                               |
|          | <i>Crepidula plana</i>       | P | 12   | 71.9 | Lima & Pechenik (53)          |
|          |                              |   | 20   | 31.2 |                               |
|          |                              |   | 25   | 28.9 |                               |
|          |                              |   | 29   | 18.1 |                               |
|          | <i>Haliotis asinina</i>      | L | 25   | 2.7  | Sawatpeera <i>et al.</i> (54) |
|          |                              |   | 28   | 2.0  |                               |
|          |                              |   | 31   | 1.7  |                               |
|          | <i>Haliotis fulgens</i>      | L | 25.5 | 3    | Leighton (55)                 |
|          |                              |   | 22.5 | 4    |                               |
|          | <i>Haliotis sorenseni</i>    | L | 20   | 7    | Leighton (56)                 |
|          |                              |   | 18   | 11   |                               |
|          |                              |   | 12   | 18   |                               |
|          |                              |   | 14   | 15   |                               |
|          |                              |   | 16   | 13   |                               |
|          | <i>Mactra solidissima</i>    | P | 22   | 19   | Loosanoff & Davis (51)        |
|          |                              |   | 14   | 35   |                               |
|          | <i>Mopalia muscosa</i>       | L | 16   | 26.6 | Pechenik (57)                 |

---

---

|                            |   |      |      |                                |
|----------------------------|---|------|------|--------------------------------|
|                            |   | 11   | 19.9 |                                |
| <i>Mytilus edulis</i>      | P | 16   | 16   | Bayne (58)                     |
|                            |   | 11   | 39   |                                |
| <i>Nassarius obsoletus</i> | P | 17.5 | 21   | Scheltema (59)                 |
|                            |   | 23.0 | 16   |                                |
|                            |   | 25.2 | 10   |                                |
| <i>Ostrea lurida</i>       | L | 24   | 7    | Loosanoff & Davis (51)         |
|                            |   | 18   | 16   |                                |
| <i>Perna viridis</i>       | P | 24   | 37.5 | Nair & Appukuttan (60)         |
|                            |   | 27   | 22.0 |                                |
|                            |   | 29   | 16.6 |                                |
|                            |   | 31   | 19.0 |                                |
| <i>Strombus gigas</i>      | P | 24   | 24   | Davis (61)                     |
|                            |   | 28   | 22   |                                |
|                            |   | 32   | 16   |                                |
| <i>Tivela mactroides</i>   | P | 22   | 20.9 | De Severeyn <i>et al.</i> (62) |
|                            |   | 25   | 16.7 |                                |
|                            |   | 28   | 13.0 |                                |
| <i>Tonicella lineata</i>   | L | 10.0 | 3.8  | Barnes (63)                    |
|                            |   | 12.5 | 2.7  |                                |

---

Developmental mode refers to whether larvae need to feed from the environment (plankotrophic - P) or carry nourishment in yolk sacs (lecithotrophic – L). Temp (°C) are the temperature treatments for which PLD was recorded that met our criteria and were included in our study. PLD values are reported here as in the original publications.

1. Ushakova, OO (2003) *J Exp Mar Biol Ecol* 296:23-33.
2. Qui JW, Qian PY (1997) *Mar Ecol Prog Ser* 152:79-88.
3. Ushakova OO, Sarantchova OL (2004) *J Exp Mar Biol Ecol* 301:129-139.
4. George JD (1966) *Biol Bull* 130:76-93.
5. Schuh M, Diesel R (1995) *J Crustacean Biol* 15:205-213.
6. Anil AC, Chiba K, Okamoto K, Kuokura H (1995) *Mar Ecol Prog Ser* 118:159-166.
7. Scheltema RS, Williams IP (1982) *Mar Ecol Prog Ser* 9:43-49.
8. Thiyagarajan V, Tilmann H, Qian PY (2003) *J Exp Mar Biol Ecol* 287:223-236.
9. Thessalou-Legaki M (1990) *J. Crustacean Biol* 10:659-666.
10. Sulkin SD, McKeen GL (1994) *Mar Biol (Berlin)* 118:593-600.
11. Johns DM (1981) *Mar Ecol Prog Ser* 5:75-83.
12. Sulkin SD, McKeen GL (1989) *Mar Biol* 103:31-37.

13. Dawirs RR, Dietrich A (1986) *J Exp Mar Biol Ecol* 99:133-147.
14. Burrows MT, Hawkins SJ, Southward AJ (1999) *J Mar Biol Assoc UK* 79:93-101.
15. Harms J (1984) *Helgol Meeresunt* 38:123-134.
16. Anger K (1991) *Mar Ecol Prog Ser* 72:103-110.
17. Epifanio CE, Dittel AI, Park S, Schwalm S, Fouts A (1998) *Mar Ecol Prog Ser* 170:231-238.
18. MacKenzie BR (1988) *J Exp Mar Biol Ecol* 116:87-98.
19. Anger K (1983) *J Exp Mar Biol Ecol* 69:203-215.
20. Laughlin R (1983) *Biol Bull* 164:93-103.
21. Anger K, Lovrich GA, Thatje S, Calcagno JA (2004) *J Exp Mar Biol Ecol* 206:217-230.
22. Calado R, Rigueredo J, Rosa R, Nunes ML, Narciso L (2005) *Aquaculture* 245:221-237.
23. Brown SD, Bert TM, Tweedale WA, Torres JJ, Lindberg WJ (1992) *J Exp Mar Biol Ecol* 157:115-136.
24. Larez MB, Palazon-Fernandez JL, Bolanos CJ (2000) *J Plank Res* 22:1855-1869.
25. Valdes L, Alvarez-Ossorio MT, Gonzalez-Gurriaran E (1991) *J Mar Biol Assoc UK* 71:787-798.
26. Dawirs RR (1979) *Mar Ecol Prog Ser* 1:323-329.
27. Blaszkowski C, Moreira GS (1986) *J Exp Mar Biol Ecol* 103:77-86.
28. Antonopoulou E, Emson R (1989) in *Reproduction, Genetics and Distributions of Marine Organisms. 23<sup>rd</sup> European Mar. Biol. Symposium.* eds Ryland JS and Tyler PA (Olsen & Olsen, Fredensborg), pp. 339-347.
29. McKenney CL, Jr., Neff JM (1979) *Mar Biol* 52:177-188.
30. Sandifer PA (1973) *Fish Bull* 71:115-123.
31. Rasmussen T, Tande K (1995) *Mar Ecol Prog Ser* 118:149-157.
32. Sastry AN (1970) *Helgol Meeresunt* 20:406-416.
33. Anger K, Thatje S, Lovrich G, Calcagno J (2003) *Mar Ecol Prog Ser* 253:243-251.
34. Yang WT (1971) *Biol Bull* 140: 166-189.
35. Costlow JD, Bookhout CG, Monroe RJ (1960) *Physiol Zool* 39:81-100.
36. Hamasaki K (2003) *Aquaculture* 219:561-572.
37. Costlow JD, Bookhout CG, Monroe RJ (1960) *Biol Bull* 188:183-202.
38. Christy JH (1989) *Mar Ecol Prog Ser* 57:259-266.
39. Pennington JT, Tamburri MN, Barry JP (1999) *Biol Bull* 196:245-256.
40. Green BS, Fisher R (2004) *J Exp Mar Biol Ecol* 299:115-132.
41. McGurk MD (1984) *Mar Biol* 84:13-26.
42. Otterlei E, Gunnar N, Folkvord A, Stefansson SO (1999) *Can J Fish Aquat Sci* 56:2099-2111.
43. Laurence GC (1975) *Mar Biol* 32:223-229.
44. Nissling A (2004) *Hydrobiol* 514:115-123.
45. McCormick MI, Molony BW (1995) *Mar Ecol Prog Ser* 118:59-68.
46. McEdward LR (1985). *J Exp Mar Biol Ecol* 93:168-182.
47. Watts SA, Scheibling RE, Marsh AG, McClintock JB (1982) *Biol Bull* 163:348-354.
48. Roller RA, Stickle WB (1993) *Mar Biol (Berlin)* 116: 583-591.
49. Kingston P (1974) *J Mar Biol Assoc UK* 54: 309-317.
50. Hodgson CA, Bourne N (1988) *J Shellfish Res* 7:349-358.



51. Loosanoff VL, Davis HC (1963) *Adv Mar Biol* 1:1-136.
52. Pechenik JA (1984) *J Exp Mar Biol Ecol* 74:241-257.
53. Lima GM, Pechenik JA (1985) *J Exp Mar Biol Ecol* 90:55-71
54. Sawatpeera S, Upatham ES, Kruatrachue M, Chitramvong YP, Sonchaeng P, Pumthong T, Nugranad J (2004) *J Shellfish Res* 20:593-601.
55. Leighton DL (1974) *Fish Bull* 72:1137-1145.
56. Leighton DL (1972) *Fish Bull* 70:373-381.
57. Pechenik JA (1984) *J Invert Reprod Dev* 7:2-12.
58. Bayne (1965) *Ophelia* 2:1-47
59. Scheltema RS (1967) *Biol Bull* 132: 253-265.
60. Manoj Nair R, Appukuttan KK (2003) *Aquacult Res* 34:1037-1045.
61. Davis M (2000) *J Shellfish Res* 19: 883-889.
62. de Severeyn YG, Severeyn H, Grant W, Reverol Y (2000) *Ecol Mod* 129:143-151.
63. Barnes JR (1972) Oregon State University, Corvallis. pp: 149.
