# Supplementary material
Source: PubMed Central journal article supplement (PMC1783129)
Supplement: pnas_0603422104_7.pdf [file pnas_0603422104_7.pdf]

**Table 6: Model comparison for cold adaptation using likelihood ratio tests for 69 species.**

| Within-species predictors                          | Species-level predictors                                                                     | AIC    | Log-likelihood | <i>P</i> |
|----------------------------------------------------|----------------------------------------------------------------------------------------------|--------|----------------|----------|
| ln(temperature),<br>(ln(temperature)) <sup>2</sup> |                                                                                              | 132.00 | -61.00         | —        |
| ln(temperature),<br>(ln(temperature)) <sup>2</sup> | Mean ln(temperature)                                                                         | 120.89 | -54.44         | <0.001   |
| ln(temperature),<br>(ln(temperature)) <sup>2</sup> | Mean ln(temperature),<br>developmental mode                                                  | 113.50 | -49.74         | 0.002    |
| ln(temperature),<br>(ln(temperature)) <sup>2</sup> | Mean ln(temperature),<br>developmental mode,<br>mean ln(temperature)<br>x developmental mode | 115.14 | -49.57         | 0.559    |

Using a random intercepts model (Eq. 4, main text; repeated as Eq. 7 in S.I. Table 8, below) as a baseline, we tested whether some of the species-level variation in intercepts can be explained by the mean ln(test temperature) for each species and/or a species' developmental mode (lecithotrophic vs. planktotrophic). Reported values are for variable-added-last likelihood ratio tests. See Fig 4.
