# Supplementary material
Source: PubMed Central journal article supplement (PMC1783129)
Supplement: pnas_0603422104_8.pdf [file pnas_0603422104_8.pdf]

**Table 7: Multilevel model of individual- and species-level effects of temperature, mean ln(temperature tested) and developmental mode on PLD (Eq. 7, centered at 15 °C).**

**Summary of Fixed Effects**

| Individual (Level-1) parameter                           | Species (Level-2) regression model | Parameter | Estimate | Standard error |
|----------------------------------------------------------|------------------------------------|-----------|----------|----------------|
| Intercept ( $\beta_{0i}$ )                               | Intercept                          | $\beta_0$ | 0.511    | 0.598          |
|                                                          | Mean ln(test temperature)          | $\beta_3$ | 0.739    | 0.209          |
|                                                          | Developmental mode                 | $\beta_4$ | 0.714    | 0.225          |
| Rate of change: ln(temperature) ( $\beta_{1i}$ )         |                                    | $\beta_1$ | - 1.368  | 0.047          |
| Curvature: ln(temperature) <sup>2</sup> ( $\beta_{2i}$ ) |                                    | $\beta_2$ | - 0.283  | 0.041          |

**Summary of Random Effects**

| Variance components                         | Parameter  | Estimate |
|---------------------------------------------|------------|----------|
| Level-1 (within species)                    | $\sigma^2$ | 0.023    |
| Level-2 (between species in initial status) | $\tau^2$   | 0.543    |

Different parameter values for  $\beta_0$ ,  $\beta_1$ ,  $\beta_2$  are obtained when mean ln(temperature tested) and developmental mode are not included in the model (Fig 1B, main text, Table 6; Table 11 in *SI Appendix*).
