# Supplementary material
Source: PubMed Central journal article supplement (PMC1783129)
Supplement: pnas_0603422104_9.pdf [file pnas_0603422104_9.pdf]

**Table 8: Log-likelihood ratio tests for exponential models quadratic in temperature on a log-log scale for 72 species.**

| Eq. | Model: Linearized power law model quadratic in temperature                                                                                                                  | Model description                                    | Log-likelihood | <i>P</i> |
|-----|-----------------------------------------------------------------------------------------------------------------------------------------------------------------------------|------------------------------------------------------|----------------|----------|
| 12  | $\ln(PLD_{ij}) = \beta_0 + \beta_1 * \ln(T_{ij}/T_c) + \beta_2 * (\ln(T_{ij}/T_c))^2 + \varepsilon_{ij}$                                                                    | No random effects                                    | -263.27        | —        |
| 13* | $\ln(PLD_{ij}) = \beta_0 + \beta_1 * \ln(T_{ij}/T_c) + \beta_2 * (\ln(T_{ij}/T_c))^2 + u_{0i} + \varepsilon_{ij}$                                                           | Random intercepts only                               | -81.10         | <0.001   |
| 14  | $\ln(PLD_{ij}) = \beta_0 + \beta_1 * \ln(T_{ij}/T_c) + \beta_2 * (\ln(T_{ij}/T_c))^2 + u_{0i} + u_{1i} * \ln(T_{ij}/T_c) + \varepsilon_{ij}$                                | Random intercepts and 'slopes'                       | -76.14         | 0.007    |
| 15  | $\ln(PLD_{ij}) = \beta_0 + \beta_1 * \ln(T_{ij}/T_c) + \beta_2 * (\ln(T_{ij}/T_c))^2 + u_{0i} + u_{1i} * \ln(T_{ij}/T_c) + u_{2i} * (\ln(T_{ij}/T_c))^2 + \varepsilon_{ij}$ | Random intercepts, slopes and quadratic coefficients | -71.93         | 0.038    |

*P* values are for modified incremental likelihood ratio tests that compare the model in one row with the model that appears immediately above it. We follow the methodology outlined in Verbeke and Molenberghs (2000, pp. 70-71)<sup>1</sup>, for carrying out these tests. See also p. 26 of the *Supporting Text 2*. Eq. 13 is of the same form as Eq. 4.

<sup>1</sup> Verbeke G, Molenberghs G (2000) *Linear mixed models for longitudinal data* (Springer-Verlag, New York).

**References**

1. Conover, DO & Schultz, ET (1995) Trends in Ecology & Evolution 10, 248-252.
2. Atkinson, D (1994) Advances in ecological research 25, 1-58.
3. Singer, JD & Willett, JB (2003) Applied longitudinal data analysis (Oxford University Press, New York).
4. Ashartous, D & de Leeuw, J (2005) Journal of Educational and Behavioral Statistics 30, 109-139.
5. Gelman, A (2006) Technometrics 48, 432-435.
6. Fitzmaurice, GM, Laird, NM, & Ware, JH (2004) Applied Longitudinal Data Analysis (Wiley, New York).
7. Brown, JH, Gillooly, JF, Allen, AP, Savage, VM, & West, GB (2004) Ecology 85, 1771-1789.
8. Gillooly, JF, Brown, JH, West, GB, Savage, VM, & Charnov, EL (2001) Science 293, 2248-2251.
9. Burnham, KP & Anderson, DR (2002) Model selection and multimodel inference (Springer-Verlag, New York).
10. Verbeke, G & Molenbergs, G (2000) Linear mixed models for longitudinal data (Springer-Verlag, New York).
