# Supplementary material
Source: PubMed Central journal article supplement (PMC1783129)
Supplement: pnas_0603422104_10.pdf [file pnas_0603422104_10.pdf]

**Table 9: Modified log-likelihood ratio tests for UTD model.**

| Eq.       | Model: Universal temperature dependence (UTD)                                                                                 | Model description              | Log-likelihood | <i>P</i> |
|-----------|-------------------------------------------------------------------------------------------------------------------------------|--------------------------------|----------------|----------|
| <b>16</b> | $\ln(PLD_{ij}) = \beta_0 + \beta_1 * (1 / (k^*(T_{ij}+273))) + \varepsilon_{ij}$                                              | No random effects              | -263.04        | —        |
| <b>17</b> | $\ln(PLD_{ij}) = \beta_{0i} + \beta_1 * (1 / (k^*(T_{ij}+273))) + u_{0i} + \varepsilon_{ij}$                                  | Random intercepts only         | -85.15         | <0.001   |
| <b>18</b> | $\ln(PLD_{ij}) = \beta_{0i} + \beta_1 * (1 / (k^*(T_{ij}+273))) + u_{0i} + u_{1i} / (k^*((T_{ij}) + 273)) + \varepsilon_{ij}$ | Random intercepts and 'slopes' | -80.04         | 0.004    |

Testing for needed random effects in the UTD model (Eq. 3) for full data set (72 species, S.I. Tables 3 and 4). We follow the methodology outlined in Verbeke and Molenberghs (2000, pp. 70-71)<sup>2</sup>, for carrying out these tests. See also p. 26 of *Supporting Text 2*.

<sup>2</sup> Verbeke G, Molenberghs G (2000) *Linear mixed models for longitudinal data* (Springer-Verlag, New York).
