# Supplementary material
Source: PubMed Central journal article supplement (PMC1783129)

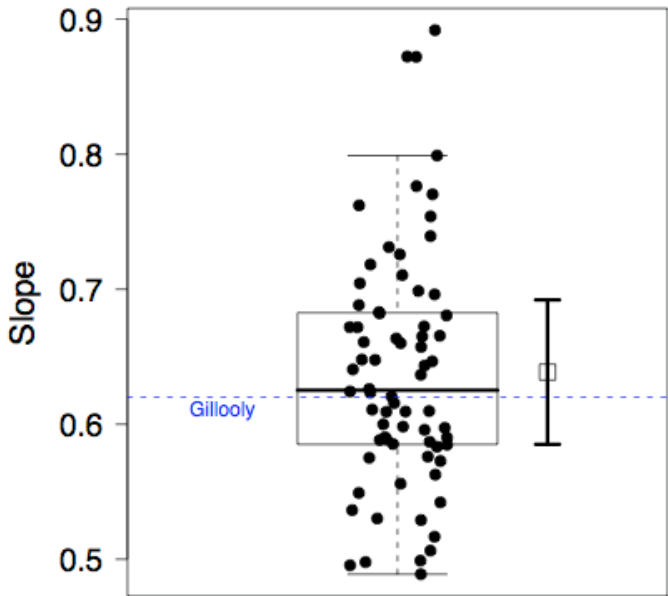

Supplement: pnas_0603422104_2.pdf [file pnas_0603422104_2.pdf]

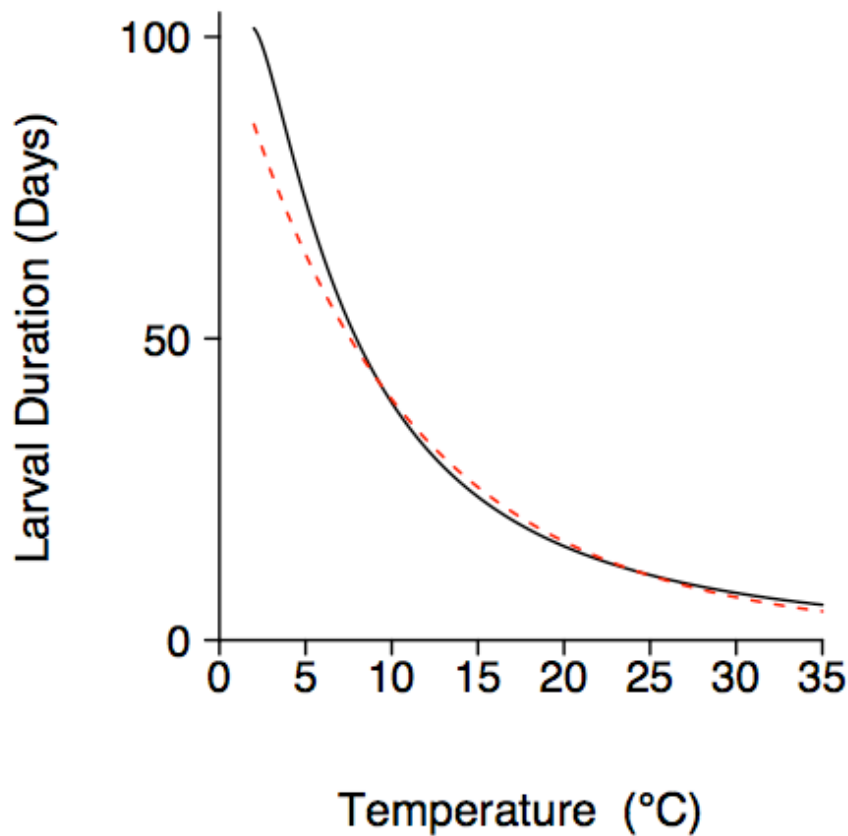

Supplement: pnas_0603422104_3.pdf [file pnas_0603422104_3.pdf]
